# Supplementary material for: Deep learning accurately identifies fjord benthic foraminifera
Source: Copernicus journal article supplement (doi:10.5194/jm-44-693-2025), 2025-12-17
Supplement: Supplementary file 1 [file jm-44-693-2025-supplement.pdf]

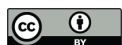

*Supplement of*

## **Deep learning accurately identifies fjord benthic foraminifera**

**Marko Plavetić et al.**

*Correspondence to:* Irina Polovodova Asteman ([irina.polovodova@marine.gu.se](mailto:irina.polovodova@marine.gu.se))

The copyright of individual parts of the supplement might differ from the article licence.

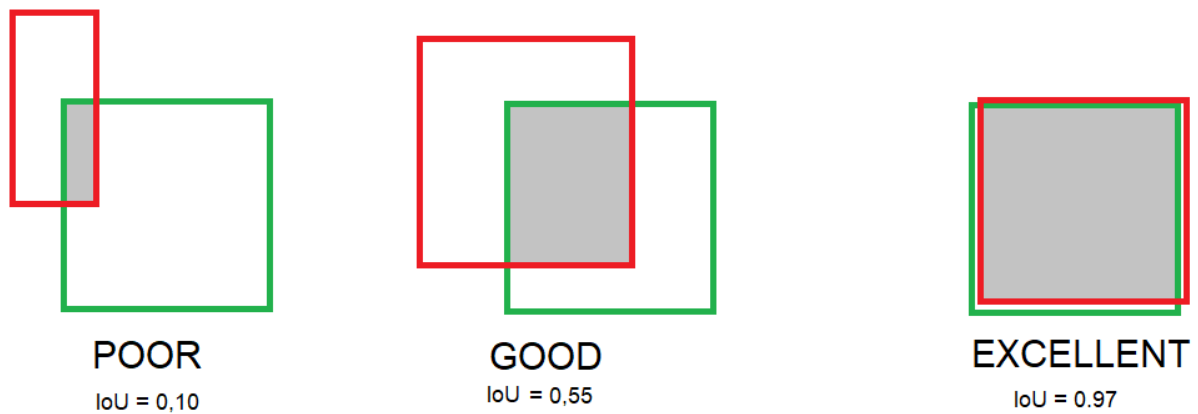

**Figure S1. Illustration of the IoU measure. The green bounding box is the ground truth, and the red is the detected bounding box. IoU depends on the threshold defined by the user, so a threshold can be higher or lower than the ones depicted in the figure.**

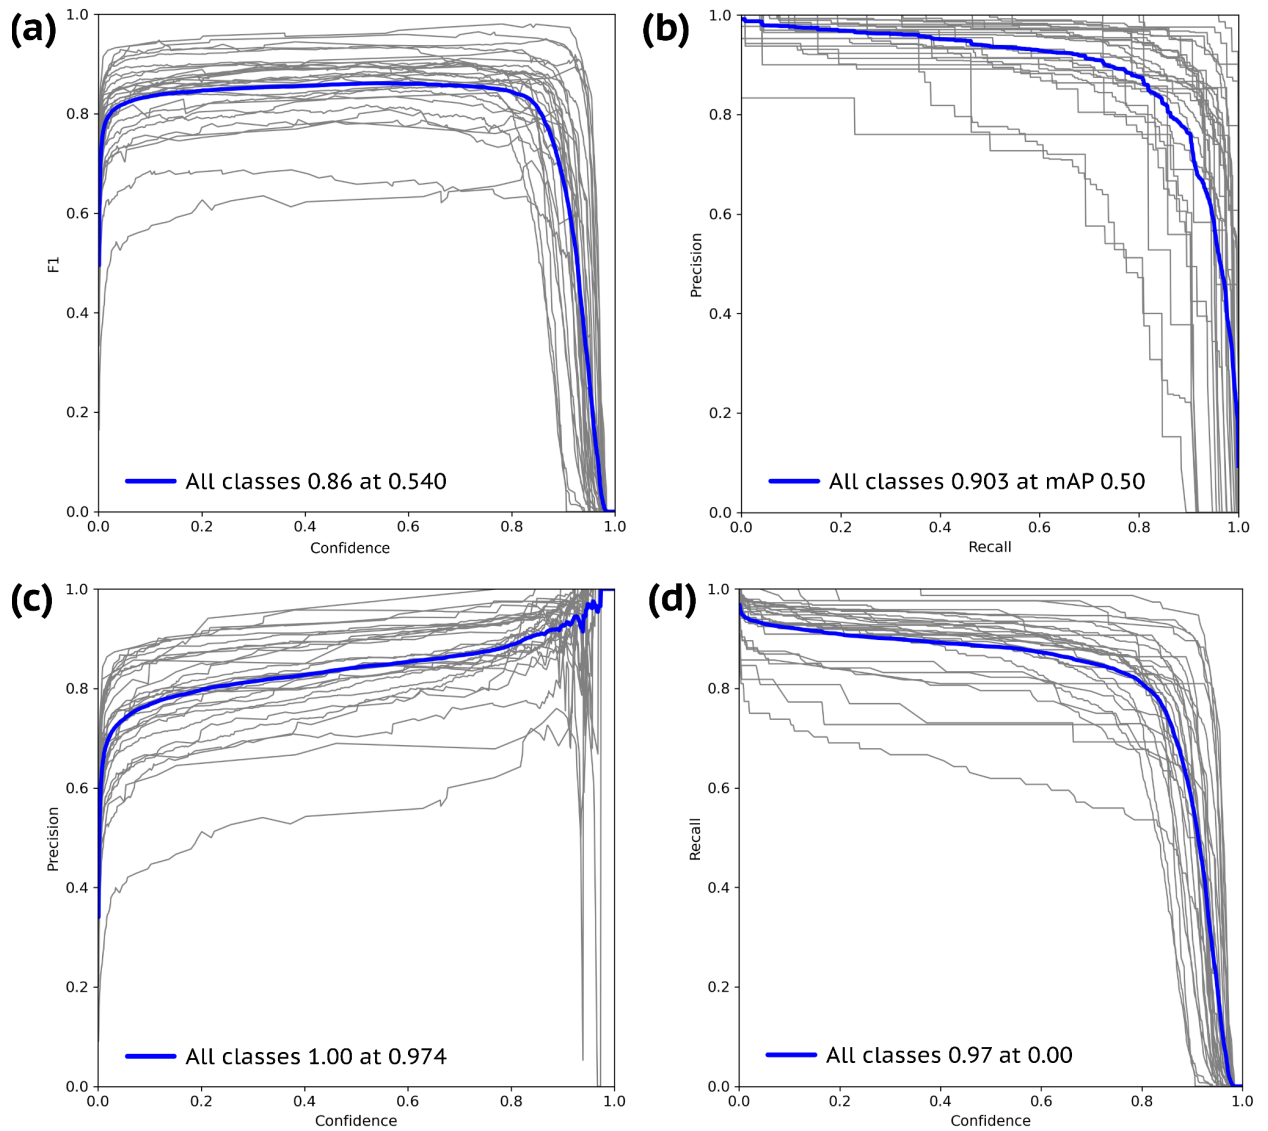

**Figure S2.** Evaluation metrics for the best performing model, exp 50, at different confidence thresholds. The blue line represents the optimal confidence threshold for maximizing (a) F<sub>1</sub> score (max value 0.86, confidence threshold 0.540), (c) precision (max value 1.00, confidence threshold 0.974), and (d) recall (max value 0.97, confidence threshold 0.0). The Precision-Recall (PR) curve is shown in (b), with the area under the curve equal to 0.903 at a mean average precision (mAP) of 0.50. The area under the curve indicates strong model performance with high precision and recall.

**Figures S3-S9:** Examples of images taken during the SEEPS II cruise. They are here to illustrate the performance of the model on unpicked samples imaged in micropaleontological tray to showcase the excellent ability of the model to ignore sediment, detrital grains and faecal pellets present in images.

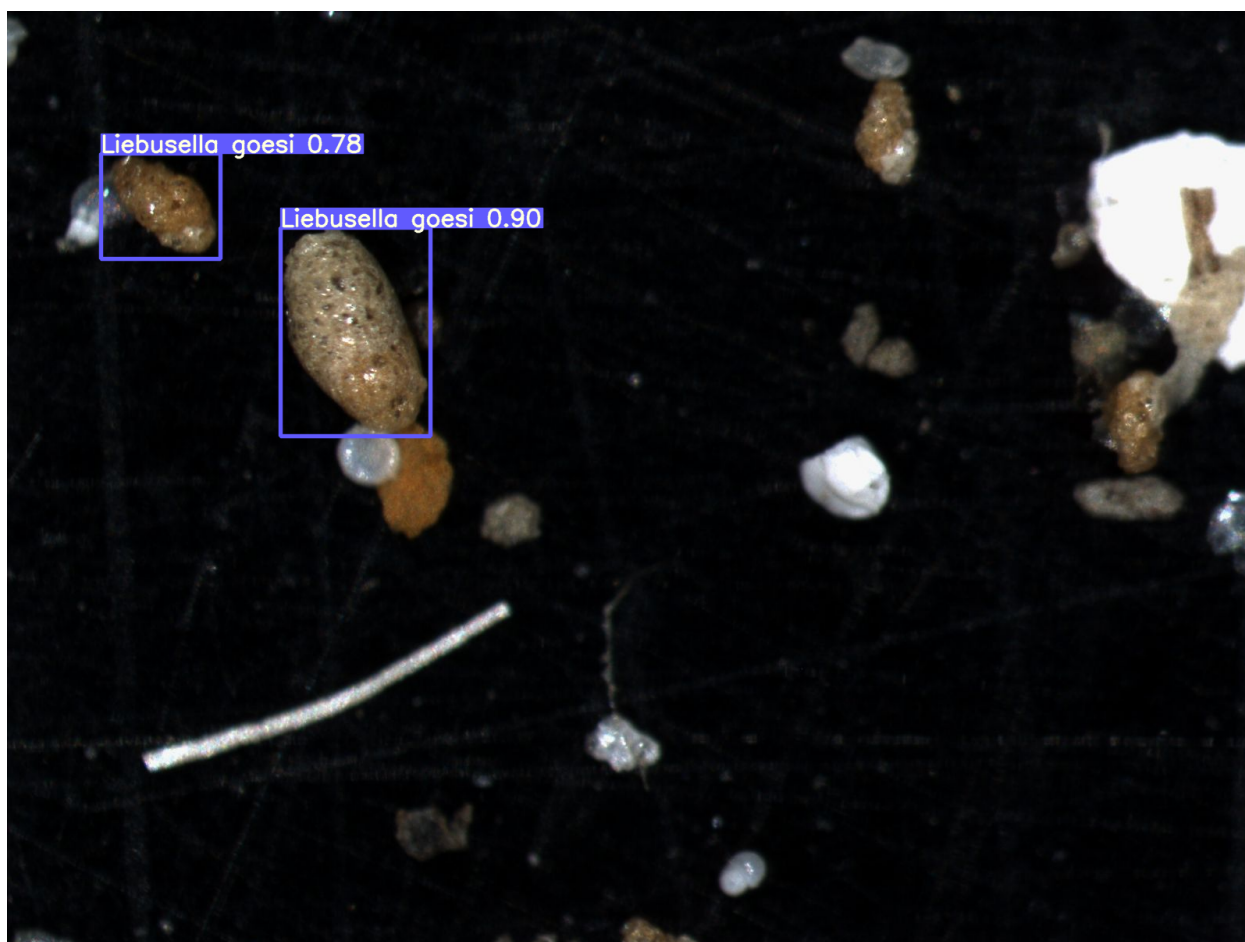

Figure S3



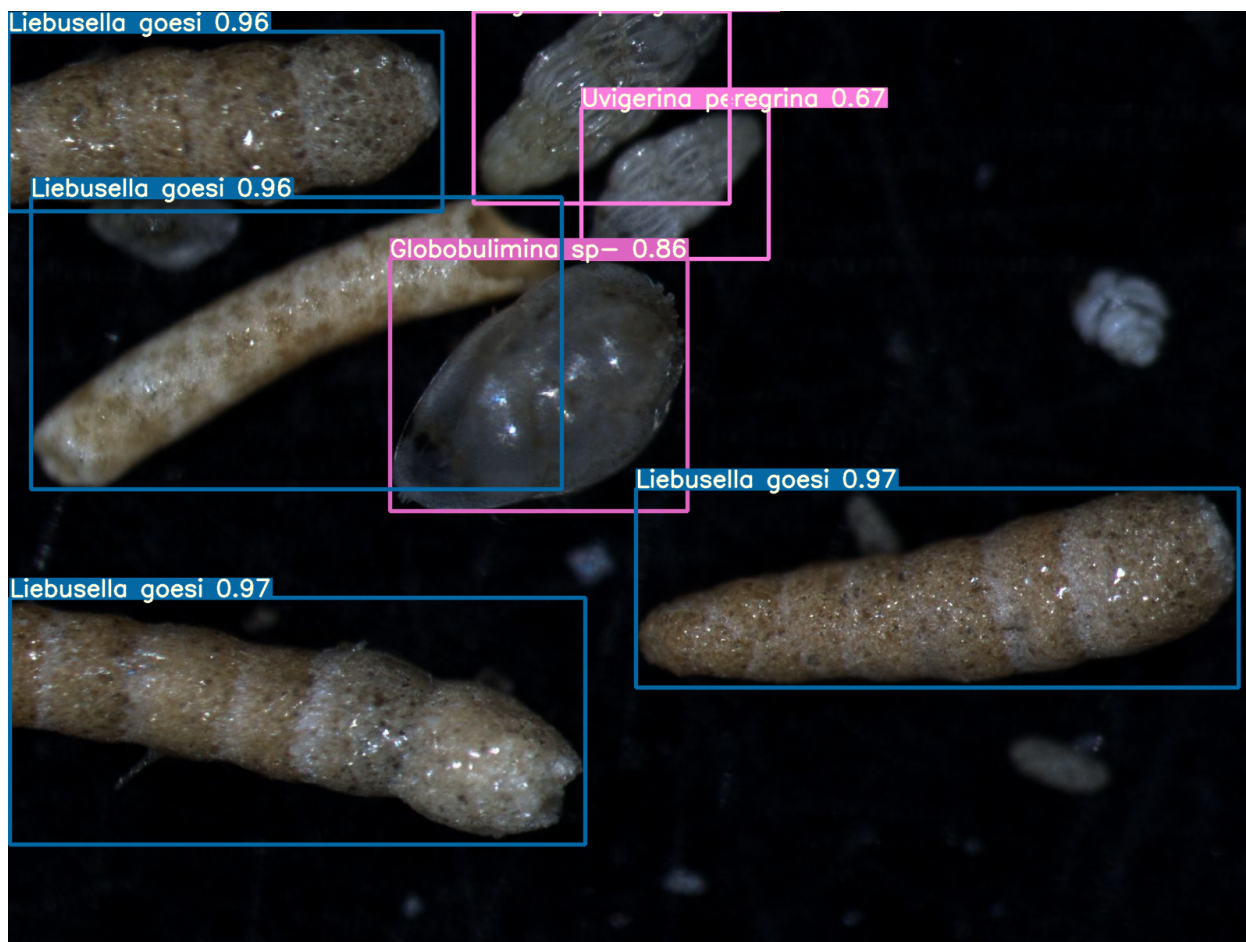

Figure S4

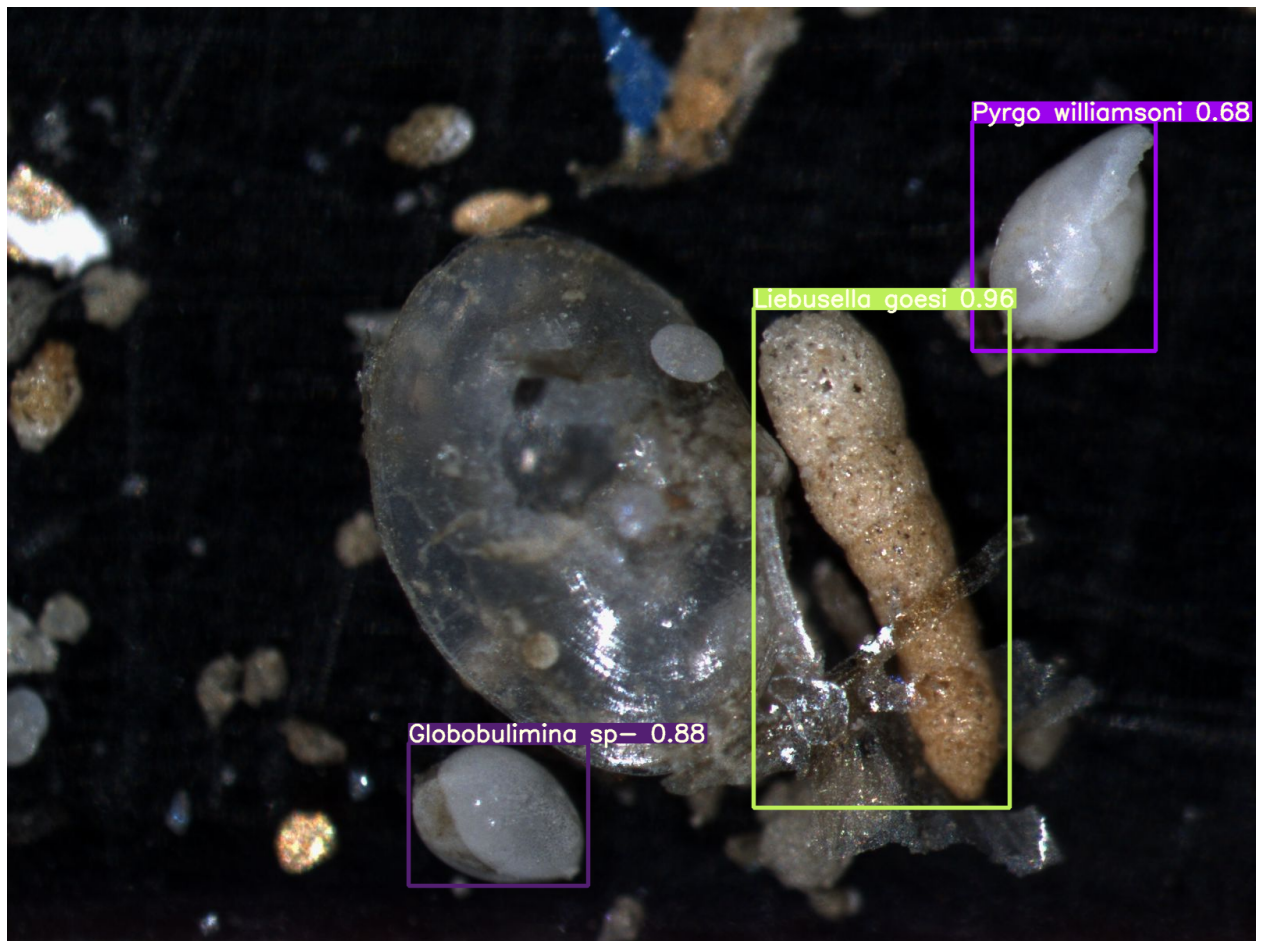

Figure S5

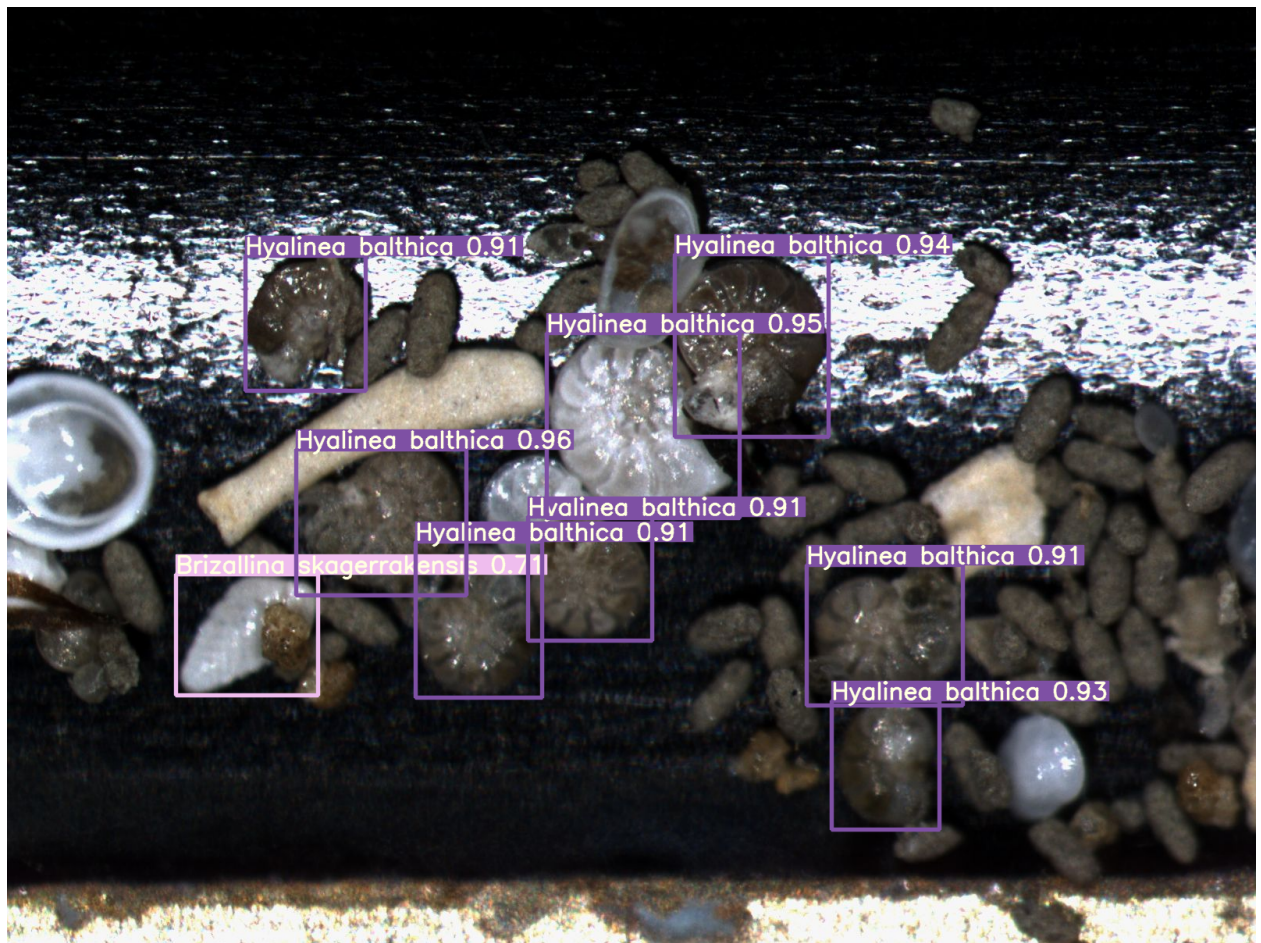

**Figure S6**



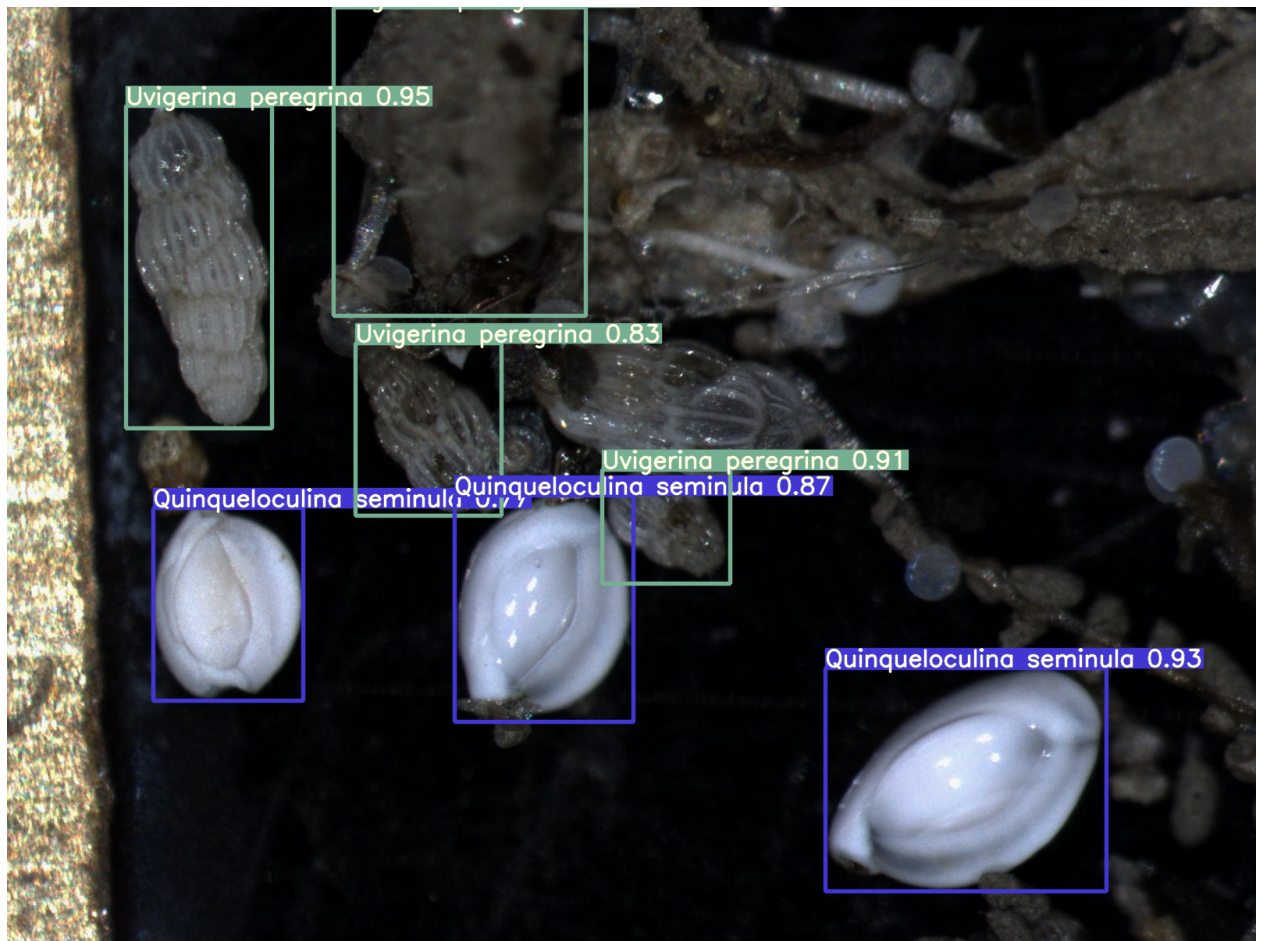

**Figure S7**

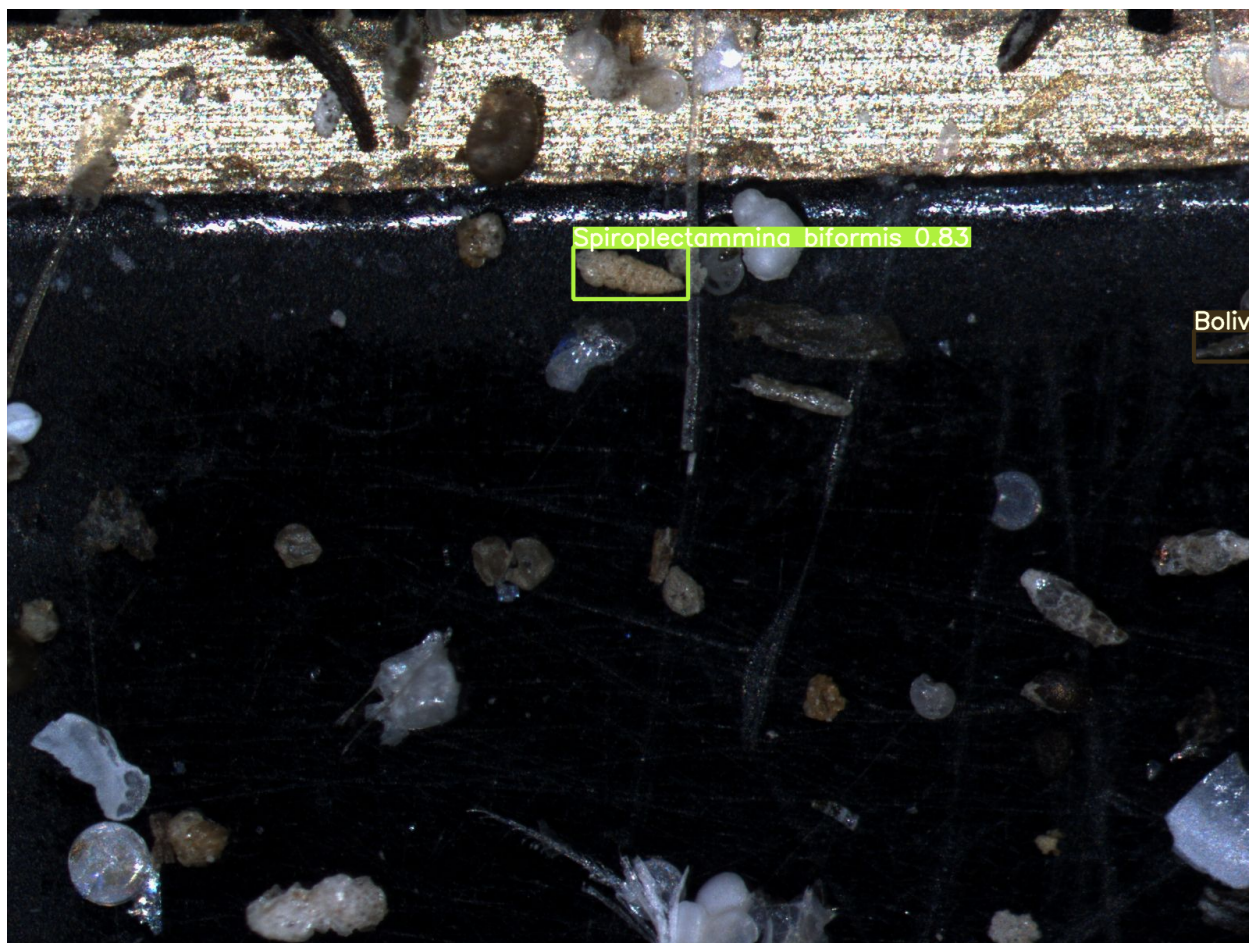

Figure S8

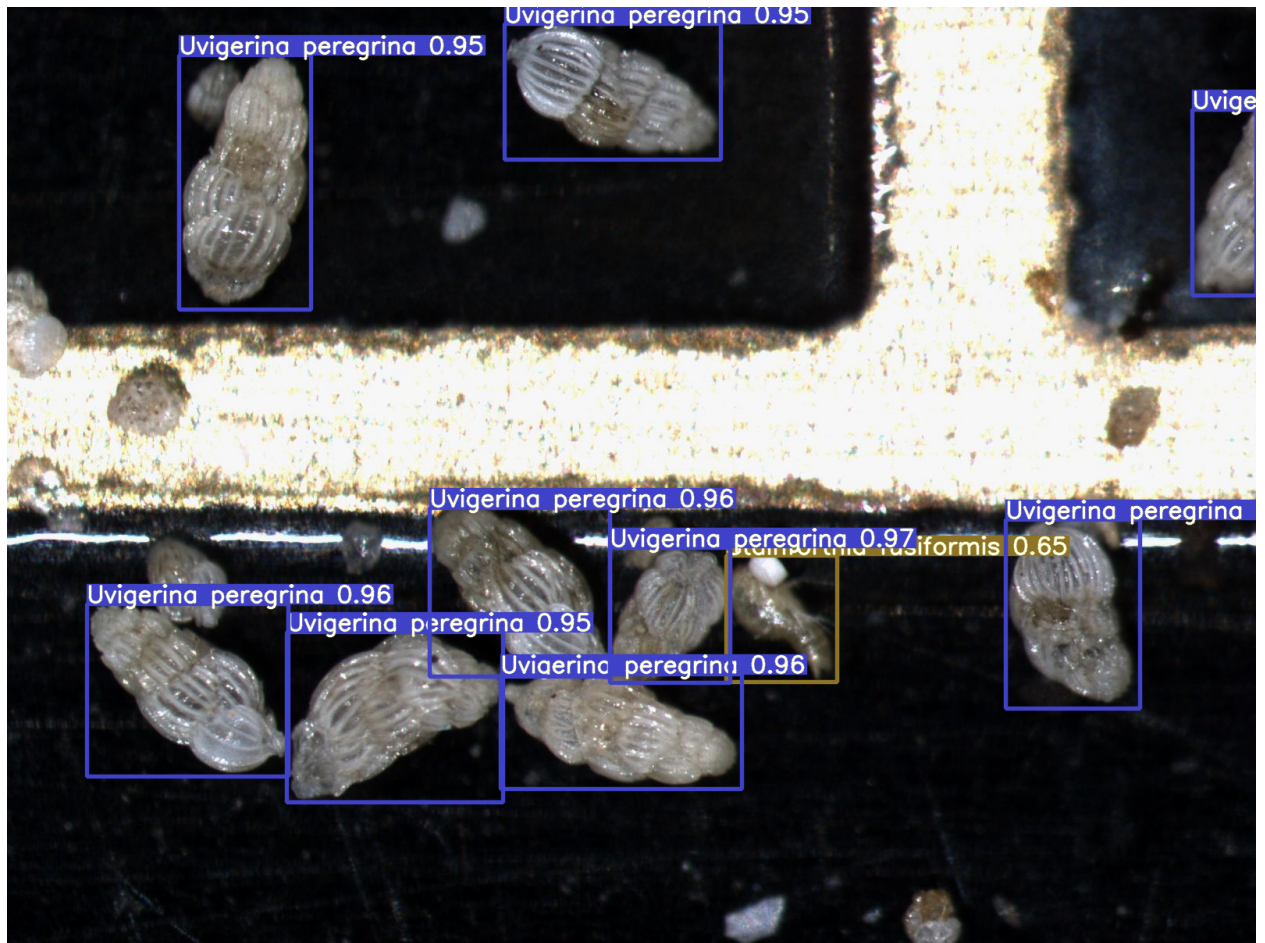

**Figure S9**

**Table S1. List of all trained YOLO models, both successful or failed.**

| Model  | P      | R      | mAP@.5 | mAP@.5:.95 | model architecture |
|--------|--------|--------|--------|------------|--------------------|
| exp 1  | failed | failed | failed | failed     | YOLOv7E6E@640      |
| exp 2  | failed | failed | failed | failed     | YOLOv7E6E@640      |
| exp 3  | failed | failed | failed | failed     | YOLOv7E6E@640      |
| exp 4  | 0.765  | 0.670  | 0.740  | 0.598      | YOLOv7W6@1280      |
| exp 5  | 0.781  | 0.797  | 0.830  | 0.658      | YOLOv7@640         |
| exp 6  | failed | failed | failed | failed     | YOLOv7W6@1280      |
| exp 7  | 0.748  | 0.740  | 0.784  | 0.592      | YOLOv7@640         |
| exp 8  | 0.781  | 0.747  | 0.821  | 0.632      | YOLOv7@640         |
| exp 9  | failed | failed | failed | failed     | YOLOv7W6@1280      |
| exp 10 | 0.868  | 0.855  | 0.889  | 0.696      | YOLOv7@640         |
| exp 11 | failed | failed | failed | failed     | YOLOv7E6E@640      |



|        |        |        |        |        |                |
|--------|--------|--------|--------|--------|----------------|
| exp 12 | failed | failed | failed | failed | YOLOv7E6E@640  |
| exp 13 | failed | failed | failed | failed | YOLOvE6E@1280  |
| exp 14 | 0.616  | 0.196  | 0.0697 | 0.0383 | YOLOv7@640     |
| exp 15 | 0.700  | 0.617  | 0.648  | 0.499  | YOLOv7E6E@1280 |
| exp 16 | failed | failed | failed | failed | YOLOv7W6@1280  |
| exp 17 | failed | failed | failed | failed | YOLOv7W6@1280  |
| exp 18 | failed | failed | failed | failed | YOLOv7W6@1280  |
| exp 19 | failed | failed | failed | failed | YOLOv7W6@1280  |
| exp 20 | failed | failed | failed | failed | YOLOv7W6@1280  |
| exp 21 | failed | failed | failed | failed | YOLOv7W6@1280  |
| exp 22 | failed | failed | failed | failed | YOLOv7W6@1280  |
| exp 23 | failed | failed | failed | failed | YOLOv7W6@1280  |
| exp 24 | failed | failed | failed | failed | YOLOv7W6@1280  |
| exp 25 | failed | failed | failed | failed | YOLOv7E6E@1280 |
| exp 26 | failed | failed | failed | failed | YOLOv7E6E@1280 |
| exp 27 | failed | failed | failed | failed | YOLOv7E6E@1280 |
| exp 28 | failed | failed | failed | failed | YOLOv7E6E@1280 |
| exp 29 | failed | failed | failed | failed | YOLOv7E6E@640  |
| exp 30 | failed | failed | failed | failed | YOLOv7E6E@1280 |
| exp 31 | failed | failed | failed | failed | YOLOv7E6E@640  |
| exp 32 | failed | failed | failed | failed | YOLOv7E6E@640  |
| exp 33 | failed | failed | failed | failed | YOLOv7E6E@1280 |
| exp 34 | failed | failed | failed | failed | YOLOv7x@640    |
| exp 35 | failed | failed | failed | failed | YOLOv7x@640    |
| exp 36 | failed | failed | failed | failed | YOLOv7E6E@1280 |
| exp 37 | failed | failed | failed | failed | YOLOv7x@640    |
| exp 38 | failed | failed | failed | failed | YOLOv7E6E@1280 |
| exp 39 | failed | failed | failed | failed | YOLOv7x@640    |
| exp 40 | failed | failed | failed | failed | YOLOv7E6E@1280 |
| exp 41 | failed | failed | failed | failed | YOLOv7E6E@640  |
| exp 42 | failed | failed | failed | failed | YOLOv7E6E@640  |
| exp 43 | failed | failed | failed | failed | YOLOv7E6E@1280 |
| exp 44 | 0.652  | 0.225  | 0.101  | 0.058  | YOLOv7x@640    |
| exp 45 | 0.757  | 0.681  | 0.688  | 0.512  | YOLOv7x@640    |
| exp 46 | 0.911  | 0.352  | 0.198  | 0.087  | YOLOv7x@640    |
| exp 47 | 0.775  | 0.587  | 0.558  | 0.321  | YOLOv7@640     |
| exp 48 | 0.781  | 0.555  | 0.598  | 0.381  | YOLOv7@640     |
| exp 49 | 0.742  | 0.596  | 0.620  | 0.281  | YOLOv7@640     |

|        |       |       |       |       |               |
|--------|-------|-------|-------|-------|---------------|
| exp 50 | 0.877 | 0.882 | 0.903 | 0.699 | YOLOv7x@640   |
| exp 51 | 0.797 | 0.849 | 0.867 | 0.661 | YOLOv7E6E@640 |
| exp 52 | 0.862 | 0.863 | 0.895 | 0.690 | YOLOvE6E@1280 |
| exp 53 | 0.833 | 0.853 | 0.870 | 0.680 | YOLOv7E6E@640 |
| exp 54 | 0.811 | 0.821 | 0.850 | 0.650 | YOLOv7@640    |
| exp 55 | 0.784 | 0.851 | 0.795 | 0.625 | YOLOv7@640    |
| exp 56 | 0.845 | 0.874 | 0.887 | 0.620 | YOLOv7x@640   |
| exp 57 | 0.832 | 0.721 | 0.820 | 0.589 | YOLOv7@640    |
| exp 58 | 0.827 | 0.883 | 0.888 | 0.691 | YOLOv7@640    |

**Table S2. Performance of model exp 50 on individual species. Counts refer to pre-augmented dataset.**

| Species                            | Precision | Recall | mAP* <sub>@.5</sub> | mAP <sub>@.5:.95</sub> | Count |
|------------------------------------|-----------|--------|---------------------|------------------------|-------|
| <i>Adercotryma glomerata</i>       | 0.862     | 0.888  | 0.883               | 0.574                  | 725   |
| <i>Ammodiscus sp.</i>              | 0.893     | 0.895  | 0.915               | 0.713                  | 774   |
| <i>Ammonia sp.</i>                 | 0.905     | 0.902  | 0.953               | 0.715                  | 1279  |
| <i>Ammoscalaria pseudospiralis</i> | 0.957     | 0.919  | 0.971               | 0.843                  | 169   |
| <i>Bathysiphon acuta</i>           | 0.687     | 0.898  | 0.750               | 0.579                  | 87    |
| <i>Bolivina pseudopunctata</i>     | 0.779     | 0.855  | 0.844               | 0.508                  | 1221  |
| <i>Brizallina skagerrakensis</i>   | 0.916     | 0.907  | 0.944               | 0.796                  | 307   |
| <i>Bulinina marginata</i>          | 0.920     | 0.947  | 0.964               | 0.780                  | 2325  |
| <i>Cassidulina laevigata</i>       | 0.908     | 0.880  | 0.910               | 0.731                  | 804   |
| <i>Cibicides lobatulus</i>         | 0.768     | 0.796  | 0.838               | 0.712                  | 549   |
| <i>Eggerelloides medius</i>        | 0.553     | 0.731  | 0.691               | 0.522                  | 97    |
| <i>Eggerelloides scaber</i>        | 0.862     | 0.931  | 0.946               | 0.765                  | 1590  |
| <i>Elphidium excavatum</i>         | 0.818     | 0.880  | 0.888               | 0.619                  | 1343  |
| <i>Globobulimina sp.</i>           | 0.939     | 0.976  | 0.989               | 0.905                  | 335   |
| <i>Hyalinea balthica</i>           | 0.925     | 0.949  | 0.975               | 0.867                  | 1719  |
| IOL**                              | 0.843     | 0.976  | 0.947               | 0.550                  | 169   |
| <i>Leptohalysis catella</i>        | 0.850     | 0.948  | 0.878               | 0.607                  | 203   |
| <i>Liebusella goesi</i>            | 0.828     | 0.935  | 0.955               | 0.846                  | 211   |
| <i>Nonionella sp. T1</i>           | 0.852     | 0.918  | 0.937               | 0.703                  | 1507  |
| <i>Nonionella turgida</i>          | 0.709     | 0.619  | 0.699               | 0.519                  | 299   |
| <i>Nonionellina labradorica</i>    | 0.899     | 0.887  | 0.925               | 0.797                  | 664   |
| <i>Pyrgo williamsoni</i>           | 0.901     | 0.810  | 0.887               | 0.800                  | 73    |
| <i>Quinqueloculina seminula</i>    | 0.976     | 0.727  | 0.856               | 0.755                  | 72    |
| <i>Quinqueloculina stalkerii</i>   | 0.778     | 0.833  | 0.824               | 0.611                  | 187   |



|                                  |       |       |       |       |      |
|----------------------------------|-------|-------|-------|-------|------|
| <i>Reophax</i> sp.               | 0.827 | 0.904 | 0.923 | 0.709 | 396  |
| <i>Spiroplectammina biformis</i> | 0.842 | 0.822 | 0.825 | 0.631 | 341  |
| <i>Stainforthia fusiformis</i>   | 0.826 | 0.933 | 0.916 | 0.610 | 1737 |
| <i>Textularia earlandi</i>       | 0.794 | 0.914 | 0.881 | 0.635 | 2105 |
| <i>Uvigerina peregrina</i>       | 0.937 | 0.987 | 0.996 | 0.883 | 215  |

\* mAP: Mean average precision

\*\* IOL: Inner Organic Linings of foraminifera, remaining after dissolution of calcareous shells.
